# Supplementary material for: Genomic analysis of the main epidemiological lineages of Acinetobacter baumannii in Mexico
Source: Front Cell Infect Microbiol. 2025 Jan 10;14:1499839. doi: 10.3389/fcimb.2024.1499839 (PMC11757933; doi:10.3389/fcimb.2024.1499839)
Supplement: Supplementary file 4 [file Table2.xlsx]

## Sheet: Hoja2
ID GenBank	Sequence Number	Genomes Groups	strain	collection_date	host_sex	isolation_source	lat_lon	ST	OCL locus	KL locus
GCA_016485585	4	1	Ab AB1336	2014	missing	not collected	not collected	758	OCL10	KL9
GCA_016487505	10	1	Ab AB1310	2014	missing	not collected	not collected	758	OCL10	KL9
GCF_021174165	86	2	Ab-HCG0511-53	2011-05-26	male	Wound secretions	Jalisco	369	OCL1	KL9		Genomes used in the core genome phylogenetic analysis
GCA_016486785	6	2	Ab AB1239	2013	missing	not collected	not collected	369	OCL1	KL9
GCA_016486905	7	2	Ab AB1238	2013	missing	not collected	not collected	369	OCL1	KL9
GCF_021173625	65	3	Ab-HCG0616-72	2016-06-20	female	urine	Jalisco	208	OCL1	KL2
GCF_021173655	67	3	Ab-HCG1016-83	2016-10-07	female	blood	Jalisco	208	OCL1	KL2
GCF_021173775	71	3	Ab-HCG0516-71	2016-05-12	male	Wound secretions	Jalisco	208	OCL1	KL2
GCF_021173935	75	3	Ab-HCG0911-61	2011-09-21	female	blood	Jalisco	208	OCL1	KL2
GCF_021173945	76	3	Ab-HCG0911-62	2011-09-24	male	blood	Jalisco	208	OCL1	KL2
GCF_021173995	78	3	Ab-HCG0911-60	2011-09-20	male	Central venous access devices	Jalisco	208	OCL1	KL2
GCF_021174025	79	3	Ab-HCG0911-57	2011-09-08	female	blood	Jalisco	208	OCL1	KL2
GCF_021174055	81	3	Ab-HCG0911-59	2011-09-19	male	blood	Jalisco	208	OCL1	KL2
GCF_021174105	83	3	Ab-HCG0911-55	2011-09-05	male	urine	Jalisco	208	OCL1	KL2
GCA_016487105	8	3	Ab AB1284	2014	missing	not collected	not collected	208	OCL1	KL2
GCA_016497705	12	4	baumannii	2018-07-12	male	Wound secretion	Ciudad de Mexico	369	OCL1	KL9
GCA_016497725	13	4	baumannii	2018-06-08	female	Bronchoaspirate	Ciudad de Mexico	369	OCL1	KL9
GCA_016497745	14	4	baumannii	2018-05-17	female	urine	Ciudad de Mexico	369	OCL1	KL9
GCA_016497785	16	4	baumannii	2018-05-16	female	Pleural fluid	Ciudad de Mexico	369	OCL1	KL9
GCA_016497805	17	4	baumannii	2018-06-12	male	Abscesses	Ciudad de Mexico	369	OCL1	KL9
GCA_016497825	18	4	baumannii	2018-08-14	female	Bronchoaspirate	Ciudad de Mexico	369	OCL1	KL9
GCA_016497845	19	4	baumannii	2018-10-05	male	Bronchoaspirate	Ciudad de Mexico	369	OCL1	KL9
GCA_016497865	20	4	baumannii	2018-09-12	female	Total blood	Ciudad de Mexico	369	OCL1	KL9
GCA_016497885	21	4	baumannii	2018-11-11	male	urine	Ciudad de Mexico	369	OCL1	KL9
GCF_030549735	143	4	Aba/78 ISSSTE 2015	2015-06-26	female	cerebrospinal fluid	Ciudad de Mexico	369	OCL1	KL9
GCA_016487345	9	4	Ab AB1293	2014	missing	not collected	not collected	369	OCL1	KL9
GCA_032217425	25	5	Microbial	2018	missing	secretion fluid	Ciudad de Mexico	758	OCL10	KL9
GCF_001922425	30	5	11510	2012	missing	Bronchial	Ciudad de Mexico	758	OCL10	KL9
GCF_001922635	31	5	11502	2012	missing	Bronchial	Ciudad de Mexico	758	OCL10	KL9
GCF_001922695	33	5	11547	2013	missing	Bronchial	Ciudad de Mexico	758	OCL10	KL9
GCF_001922705	34	5	11536	2011	missing	unknown	Ciudad de Mexico	758	OCL10	KL9
GCF_001922745	35	5	11551	2011	missing	unknown	Ciudad de Mexico	758	OCL10	KL9
GCF_001922755	36	5	11606	2011	missing	Bronchial	Ciudad de Mexico	758	OCL10	KL9
GCF_003345235	38	5	810CP	2015-01-11	male	feces	Ciudad de Mexico	758	OCL10	KL9
GCF_003976985	47	5	434H	2015-01-11	male	Bloodstream	Ciudad de Mexico	758	OCL10	KL9
GCF_003977015	48	5	483H	2015-01-11	male	Bloodstream	Ciudad de Mexico	758	OCL10	KL9
GCF_003977045	49	5	433H	2015-01-11	male	Bloodstream	Ciudad de Mexico	758	OCL10	KL9
GCF_004209005	51	5	A278	2013	missing	wound	Ciudad de Mexico	758	OCL10	KL9
GCF_004209035	53	5	A465	2014	missing	Not collected	Ciudad de Mexico	758	OCL10	KL9
GCF_004299615	58	5	Ab5013	2014	missing	Not collected	Ciudad de Mexico	758	OCL10	KL9
GCF_004321575	59	5	Ab4197	2013	missing	Not collected	Ciudad de Mexico	758	OCL10	KL9
GCF_004321595	60	5	Ab2159	2011	missing	Not collected	Ciudad de Mexico	758	OCL10	KL9
GCF_004794205	61	5	Ab5038	NA	not collected	not collected	Ciudad de Mexico	758	OCL10	KL9
GCF_030549715	142	5	Aba/77 ISSSTE 2015	2015-05-22	male	Blood culture	Ciudad de Mexico	758	OCL10	KL9
GCA_016487785	11	5	Ab AB1332	2014	missing	not collected	not collected	758	OCL10	KL9
GCA_016497765	15	6	baumannii	2018-06-11	male	Total blood	Ciudad de Mexico	208	OCL1	KL2
GCF_030549675	140	6	Aba/75 ISSSTE 2015	2015-04-13	male	Blood culture	Ciudad de Mexico	208	OCL1	KL2
GCF_030549685	141	6	Aba/76 ISSSTE 2015	2015-04-03	male	cerebrospinal fluid	Ciudad de Mexico	208	OCL1	KL2
GCF_030756475	145	6	ARC6644	2016	missing	Unknown	Unknown	208	OCL1	KL213
GCA_031140685	24	7	Microbial	2018	missing	sputum	Ciudad de Mexico	1054	OCL10	KL32
GCF_030548745	139	7	Aba/80 HGM 2016	2016-04-30	female	Blood culture	Ciudad de Mexico	1054	OCL10	KL32
GCF_001922685	32	8	4113	2013	missing	blood	Ciudad de Mexico	758	OCL10	KL9
GCF_026929695	136	8	298-03	2009-01-25	missing	wound	Jalisco	758	OCL10	KL9
GCF_026935825	137	8	075-16 HCG	2016-04-19	missing	Upper respiratory tract	Jalisco	758	OCL10	KL9
GCF_026935835	138	8	500-03	2011-10-04	missing	wound	Jalisco	758	OCL10	KL9
GCF_030549745	144	8	Aba/79 HCG 2016	2016-01-06	male	Blood culture	Jalisco	758	OCL10	KL9
GCF_021173285	63	9	Ab-HCG0316-68	2016-03-06	male	urine	Jalisco	136	OCL1	KL77
GCF_021173305	64	9	Ab-HCG1217-85	2017-12-07	male	blood	Jalisco	136	OCL1	KL77
GCF_021173645	66	9	Ab-HCG0216-81	2016-02-24	male	Respiratory tract secretions	Jalisco	136	OCL1	KL77
GCF_021173665	68	9	Ab-HCG1217-84	2017-12-06	male	blood	Jalisco	136	OCL1	KL77
GCF_021173725	69	9	Ab-HCG0216-66	2016-02-17	female	blood	Jalisco	136	OCL1	KL77
GCF_021173805	72	9	Ab-HCG0216-67	2016-02-20	female	Respiratory tract secretions	Jalisco	136	OCL1	KL77
GCF_021173925	74	9	Ab-HCG0216-65	2016-02-12	female	blood	Jalisco	136	OCL1	KL77
GCF_021174045	80	10	Ab-HCG0911-58	2011-09-08	male	Wound secretions	Jalisco	208	OCL1	KL9
GCF_021173985	77	10	Ab-HCG1011-64	2011-10-21	male	urine	Jalisco	369	OCL1	KL9
GCF_021174085	82	11	Ab-HCG0911-56	2011-09-07	female	sputum	Jalisco	208	OCL1	KL2
GCF_021174125	84	11	Ab-HCG0611-54	2011-06-03	female	Secretion	Jalisco	208	OCL1	KL2
GCF_021174795	118	11	Ab-HCG0808-17	2008-08-05	female	Wound secretions	Jalisco	208	OCL1	KL2
GCF_021174895	123	11	Ab-HCG0708-14	2008-07-31	female	Wound secretions	Jalisco	208	OCL1	KL2
GCF_021174965	126	11	Ab-HCG0108-10	2008-01-01	female	Secretion	Jalisco	208	OCL1	KL2
GCF_021175125	134	11	Ab-HCG0807-2	2007-08-27	male	blood	Jalisco	208	OCL1	KL2
GCF_021175145	135	11	Ab-HCG0307-1	2007-05-03	female	blood	Jalisco	208	OCL1	KL2
GCF_021174135	85	12	Ab-HCG0909-51	2009-09-25	female	Other secretions	Jalisco	417	OCL1	KL23
GCF_021174205	88	12	Ab-HCG0709-50	2009-07-28	male	Respiratory tract secretions	Jalisco	417	OCL1	KL23
GCF_021174265	91	12	Ab-HCG0409-48	2009-04-11	male	Central venous access devices	Jalisco	417	OCL1	KL23
GCF_021174245	90	13	Ab-HCG0309-46	2009-03-09	male	blood	Jalisco	417	OCL1	KL23
GCF_021174285	92	13	Ab-HCG0309-47	2009-03-28	male	Wound secretions	Jalisco	417	OCL1	KL23
GCF_021174295	93	13	Ab-HCG0209-45	2009-02-20	female	Respiratory tract secretions	Jalisco	417	OCL1	KL23
GCF_021174325	94	13	Ab-HCG0209-44	2009-02-04	male	Other fluids	Jalisco	417	OCL1	KL23
GCF_021174345	95	13	Ab-HCG0109-42	2009-01-19	male	blood	Jalisco	417	OCL1	KL23
GCF_021174365	96	13	Ab-HCG0109-41	2009-01-15	male	Other secretions	Jalisco	417	OCL1	KL23
GCF_021174385	97	13	Ab-HCG0109-40	2009-01-15	male	Intra-abdominal secretions	Jalisco	417	OCL1	KL23
GCF_021174395	98	13	Ab-HCG0109-38	2009-01-10	male	blood	Jalisco	417	OCL1	KL23
GCF_021174425	99	13	Ab-HCG0109-37	2009-01-03	male	Central venous access devices	Jalisco	417	OCL1	KL23
GCF_021174435	100	13	Ab-HCG0109-39	2009-01-12	male	Central venous access devices	Jalisco	417	OCL1	KL23
GCF_021174465	101	13	Ab-HCG0109-36	2009-01-01	male	Intra-abdominal secretions	Jalisco	417	OCL1	KL23
GCF_021174485	102	13	Ab-HCG1208-35	2008-12-30	male	Other secretions	Jalisco	417	OCL1	KL23
GCF_021174505	103	13	Ab-HCG1108-33	2008-11-24	male	Respiratory tract secretions	Jalisco	417	OCL1	KL23
GCF_021174515	104	13	Ab-HCG1108-32	2008-11-19	male	Respiratory tract secretions	Jalisco	417	OCL1	KL23
GCF_021174525	105	13	Ab-HCG1208-34	2008-12-06	female	cerebrospinal fluid	Jalisco	417	OCL1	KL23
GCF_021174565	106	13	Ab-HCG1108-31	2008-11-16	male	Central venous access devices	Jalisco	417	OCL1	KL23
GCF_021174585	107	13	Ab-HCG0908-27	2008-09-30	male	Central venous access devices	Jalisco	417	OCL1	KL23
GCF_021174595	108	13	Ab-HCG1108-30	2008-11-08	male	Respiratory tract secretions	Jalisco	417	OCL1	KL23
GCF_021174605	109	13	Ab-HCG1008-28	2008-10-27	male	Wound secretions	Jalisco	417	OCL1	KL23
GCF_021174645	110	13	Ab-HCG1108-29	2008-11-08	male	Central venous access devices	Jalisco	417	OCL1	KL23
GCF_021174665	111	13	Ab-HCG0908-23	2008-09-18	male	Other fluids	Jalisco	417	OCL1	KL23
GCF_021174685	112	13	Ab-HCG0908-25	2008-09-26	male	blood	Jalisco	417	OCL1	KL23
GCF_021174695	113	13	Ab-HCG0908-24	2008-09-19	male	Wound secretions	Jalisco	417	OCL1	KL23
GCF_021174725	114	13	Ab-HCG0908-26	2008-09-28	female	Central venous access devices	Jalisco	417	OCL1	KL23
GCF_021174745	115	13	Ab-HCG0808-22	2008-08-27	male	Wound secretions	Jalisco	417	OCL1	KL23
GCF_021174765	116	13	Ab-HCG0808-18	2008-08-05	male	Respiratory tract secretions	Jalisco	417	OCL1	KL23
GCF_021174775	117	13	Ab-HCG0808-20	2008-08-13	male	Wound secretions	Jalisco	417	OCL1	KL23
GCF_021174815	119	13	Ab-HCG0808-21	2008-08-25	male	Central venous access devices	Jalisco	417	OCL1	KL23
GCF_021174825	120	13	Ab-HCG0808-19	2008-08-11	male	Wound secretions	Jalisco	417	OCL1	KL23
GCF_021174865	121	13	Ab-HCG0808-16	2008-08-10	male	Wound secretions	Jalisco	417	OCL1	KL23
GCF_021174875	122	13	Ab-HCG0808-15	2008-08-02	male	Intra-abdominal secretions	Jalisco	417	OCL1	KL23
GCF_021174925	124	13	Ab-HCG0908-12	2008-09-18	male	Other fluids	Jalisco	417	OCL1	KL23
GCF_021174945	125	13	Ab-HCG0708-13	2008-07-26	male	Wound secretions	Jalisco	417	OCL1	KL23
GCF_021174985	127	14	Ab-HCG1207-7	2007-12-24	male	Wound secretions	Jalisco	208	OCL1	KL2
GCF_021175005	128	14	Ab-HCG1207-9	2007-12-26	female	Respiratory tract secretions	Jalisco	208	OCL1	KL2
GCF_021175015	129	14	Ab-HCG1207-8	2007-12-25	male	Central venous access devices	Jalisco	208	OCL1	KL2
GCF_021175045	130	14	Ab-HCG1207-6	2007-12-19	female	Respiratory tract secretions	Jalisco	208	OCL1	KL2
GCF_021175065	131	14	Ab-HCG1207-5	2007-12-10	male	Respiratory tract secretions	Jalisco	208	OCL1	KL2
GCF_021175095	133	14	Ab-HCG1107-4	2007-11-27	female	Secretion	Jalisco	208	OCL1	KL2
GCF_004296275	57	Single	H350	2015	missing	Blood culture	Ciudad de Mexico	208	OCL1	KL213
GCF_001549575	27	Single	MEX11594	2011-06-17	missing	Pleural fluid	Ciudad de Mexico	758	OCL1	KL1
GCF_004209205	2	Single	H251	2014	missing	Blood culture	Ciudad de Mexico	758	OCL1	KL9
GCF_003522785	43	Single	10042	2011-04-10	female	Secretion	Cuahuila	473	OCL1	KL22
GCF_021175075	132	Single	Ab-HCG1107-3	2007-11-09	male	Respiratory tract secretions	Jalisco	208	OCL1	KL2
GCF_021173765	70	Single	Ab-HCG0516-70	2016-05-16	female	Respiratory tract secretions	Jalisco	369	OCL1	KL9
GCF_021173815	73	Single	Ab-HCG0716-73	2016-07-14	female	cerebrospinal fluid	Jalisco	369	OCL1	KL9
GCF_021174185	87	Single	Ab-HCG1110-52	2010-11-11	female	blood	Jalisco	417	OCL1	KL23
GCF_021174225	89	Single	Ab-HCG0509-49	2009-05-08	male	Wound secretions	Jalisco	417	OCL1	KL23
GCA_016609765	22	Single	Ab AB1261	2013	missing	not collected	not collected	473	OCL1	KL22
GCF_003516005	40	Single	7847	2008-04-28	female	blood	Nuevo Leon	208	OCL1	KL2
GCF_003522885	45	Single	5845	2009-12-31	male	wound	San Luis Potosi	417	OCL1	KL23
GCA_031140665	23	Single	Microbial	2018	missing	secretion fluid	Ciudad de Mexico	758	OCL10	KL9
GCA_032217445	26	Single	Microbial	2018	missing	blood	Ciudad de Mexico	758	OCL10	KL9
GCF_001923005	37	Single	11598	2011	missing	unknown	Ciudad de Mexico	758	OCL10	KL9
GCF_003976955	46	Single	A2	2015-01-12	male	cerebrospinal fluid	Ciudad de Mexico	758	OCL10	KL9
GCF_004209225	56	Single	A580	2015	missing	Uroculture	Ciudad de Mexico	758	OCL10	KL9
GCF_004209025	52	Single	H170	2013	missing	Blood culture	Ciudad de Mexico	1091	OCL10	KL213
GCF_004209075	54	Single	A023	2011	missing	Necrotic Tissue	Ciudad de Mexico	1091	OCL10	KL213
GCF_001896005	29	Single	AF-401	2009-07-01	missing	Small Colon	Ciudad de Mexico	1942	OCL10	KL23
GCF_003522665	41	Single	9201	2013-08-01	male	blood	Jalisco	934	OCL10	KL9
GCA_016485485	3	Single	Ab AB1333	2014	missing	not collected	not collected	758	OCL10	KL9
GCF_009497995	62	Single	7835	2007-07-16	male	Tissue	Nuevo Leon	227	OCL10	KL22
GCF_001636235	28	Single	3207	2008-08-05	female	Bronchial fluid	Nuevo Leon	1321	OCL10	KL195
GCF_004208995	50	Single	A229	2013	missing	Not collected	Ciudad de Mexico	1091	OCL11	KL213
GCF_003522705	42	Single	10324	2012-08-01	male	Bronchial fluid	Gerrero	771	OCL2	KL77
GCA_016486105	5	Single	Acinetobacter AB1357	2014	missing	not collected	not collected	225	OCL3	KL22
GCF_036879965	1	Single	GN-102	2021-12-13	male	BAL	Nuevo Leon	0	OCL5	KL169
GCF_004209195	55	Single	H008	2011	missing	Not collected	Ciudad de Mexico	690	OCL6	KL22
GCF_036879865	146	Single	GN-114	2021-12-28	male	BAL	Nuevo Leon	401	OCL6	KL48
GCF_003522845	44	Single	9102	2010-06-04	female	Bronchial fluid	Baja California	231	OCL7	KL1
GCF_003431385	39	Single	7804	2006-07-05	male	bronchoalveolar lavage fluid	Nuevo Leon	490	OCL7	KL7

## Sheet: RGI
ID GenBank	Sequence Number	Genomes Groups	strain	collection_date	host_sex	isolation_source	lat_lon	ST	OCL locus	KL locus	OXA-66	OXA-72	OXA-65	OXA-239	OXA-398	OXA-58	ADC-30	ADC-73	ADC-214	TEM-1	armA	aadA	ant(3'')-IIa	aph(3'')-Ib	aph(6)-Id	aac(6')-Ian	aph(3')-Ia	aph(3')-VIa	sul1	qacED1	sul2	catB8	aac(6')-Ib'	parC	gyrA	abeM	adeR	adeS	tet(B)	tetR	OXA-83	OXA-64	OXA-69	ADC-5	OXA-235	cmlA9	qacG	ADC-11	ADC-156
GCA_016485585	4	1	Ab AB1336	2014	missing	not collected	not collected	758	OCL10	KL9	0	0	1	1	0	0	0	0	1	0	0	0	1	1	1	1	0	0	0	0	1	0	0	1	1	1	1	1	0	0	0	0	0	0	0	0	0	0	0
GCA_016487505	10	1	Ab AB1310	2014	missing	not collected	not collected	758	OCL10	KL9	0	0	1	1	0	0	0	0	1	0	0	0	1	1	1	1	0	0	0	0	1	0	0	1	1	1	1	1	0	0	0	0	0	0	0	0	1	0	0
GCA_016486785	6	2	Ab AB1239	2013	missing	not collected	not collected	369	OCL1	KL9	1	0	0	0	1	0	1	0	0	1	1	1	1	1	1	0	1	0	1	1	0	1	1	1	1	1	1	1	1	1	0	0	0	0	0	0	0	0	0
GCA_016486905	7	2	Ab AB1238	2013	missing	not collected	not collected	369	OCL1	KL9	1	0	0	0	1	0	1	0	0	1	1	1	1	1	1	0	1	0	1	1	0	1	1	1	1	1	1	1	1	1	0	0	0	0	0	0	0	0	0
GCF_021174165	86	2	Ab-HCG0511-53	2011-05-26	male	Wound secretions	Jalisco	369	OCL1	KL9	1	0	0	0	1	0	1	0	0	1	1	1	1	1	1	0	0	0	1	1	1	1	1	1	1	1	1	1	1	1	0	0	0	0	0	0	0	0	0
GCA_016487105	8	3	Ab AB1284	2014	missing	not collected	not collected	208	OCL1	KL2	1	1	0	0	0	0	0	0	0	1	1	1	1	1	1	0	1	0	1	1	1	1	1	1	1	1	1	1	1	1	0	0	0	0	0	0	0	0	0
GCF_021173625	65	3	Ab-HCG0616-72	2016-06-20	female	urine	Jalisco	208	OCL1	KL2	1	1	0	0	0	0	1	0	0	1	1	1	1	1	1	0	0	0	1	1	1	1	1	1	1	1	1	1	1	1	0	0	0	0	0	0	0	0	0
GCF_021173655	67	3	Ab-HCG1016-83	2016-10-07	female	blood	Jalisco	208	OCL1	KL2	1	1	0	0	0	0	1	0	0	0	1	1	1	1	1	0	0	0	1	1	0	1	1	1	1	1	1	1	1	1	0	0	0	0	0	0	0	0	0
GCF_021173775	71	3	Ab-HCG0516-71	2016-05-12	male	Wound secretions	Jalisco	208	OCL1	KL2	1	1	0	0	0	0	1	0	0	1	1	1	1	1	1	0	0	0	1	1	0	1	1	1	1	1	1	1	1	1	0	0	0	0	0	0	0	0	0
GCF_021173935	75	3	Ab-HCG0911-61	2011-09-21	female	blood	Jalisco	208	OCL1	KL2	1	1	0	0	0	0	1	0	0	1	1	1	1	1	1	0	0	0	1	1	1	1	1	1	1	1	1	1	1	1	0	0	0	0	0	0	0	0	0
GCF_021173945	76	3	Ab-HCG0911-62	2011-09-24	male	blood	Jalisco	208	OCL1	KL2	1	1	0	0	0	0	1	0	0	1	1	1	1	1	1	0	0	0	1	1	1	1	1	1	1	1	1	1	1	1	0	0	0	0	0	0	0	0	0
GCF_021173995	78	3	Ab-HCG0911-60	2011-09-20	male	Central venous access devices	Jalisco	208	OCL1	KL2	1	1	0	0	0	0	1	0	0	1	1	1	1	1	1	0	0	0	1	1	1	1	1	1	1	1	1	1	1	1	0	0	0	0	0	0	0	0	0
GCF_021174025	79	3	Ab-HCG0911-57	2011-09-08	female	blood	Jalisco	208	OCL1	KL2	1	1	0	0	0	0	1	0	0	1	1	1	1	1	1	0	0	0	1	1	1	1	1	1	1	1	1	1	1	1	0	0	0	0	0	0	0	0	0
GCF_021174055	81	3	Ab-HCG0911-59	2011-09-19	male	blood	Jalisco	208	OCL1	KL2	1	1	0	0	0	0	1	0	0	1	1	1	1	1	1	0	0	0	1	1	1	1	1	1	1	1	1	1	1	1	0	0	0	0	0	0	0	0	0
GCF_021174105	83	3	Ab-HCG0911-55	2011-09-05	male	urine	Jalisco	208	OCL1	KL2	1	1	0	0	0	0	1	0	0	1	1	1	1	1	1	0	0	0	1	1	1	1	1	1	1	1	1	1	1	1	0	0	0	0	0	0	0	0	0
GCA_016487345	9	4	Ab AB1293	2014	missing	not collected	not collected	369	OCL1	KL9	1	1	0	0	0	0	0	1	0	1	1	1	1	1	1	0	1	0	1	1	1	1	1	1	1	1	1	1	1	1	0	0	0	0	0	0	0	0	0
GCA_016497705	12	4	baumannii	2018-07-12	male	Wound secretion	Ciudad de Mexico	369	OCL1	KL9	1	1	0	0	0	0	0	1	0	1	1	1	1	1	1	0	1	0	1	1	0	1	1	1	1	1	1	1	1	1	0	0	0	0	0	0	0	0	0
GCA_016497725	13	4	baumannii	2018-06-08	female	Bronchoaspirate	Ciudad de Mexico	369	OCL1	KL9	1	1	0	0	0	0	0	1	0	1	1	1	1	1	1	0	1	0	1	1	0	1	1	1	1	1	1	1	1	1	0	0	0	0	0	0	0	0	0
GCA_016497745	14	4	baumannii	2018-05-17	female	urine	Ciudad de Mexico	369	OCL1	KL9	1	1	0	0	0	0	0	1	0	1	1	1	1	1	1	0	1	0	1	1	0	1	1	1	1	1	1	1	1	1	0	0	0	0	0	0	0	0	0
GCA_016497785	16	4	baumannii	2018-05-16	female	Pleural fluid	Ciudad de Mexico	369	OCL1	KL9	1	1	0	0	0	0	0	1	0	1	1	1	1	1	1	0	1	0	1	1	0	1	1	1	1	1	1	1	1	1	0	0	0	0	0	0	0	0	0
GCA_016497805	17	4	baumannii	2018-06-12	male	Abscesses	Ciudad de Mexico	369	OCL1	KL9	1	1	0	0	0	0	0	1	0	1	1	1	1	1	1	0	1	0	1	1	0	1	1	1	1	1	1	1	1	1	0	0	0	0	0	0	0	0	0
GCA_016497825	18	4	baumannii	2018-08-14	female	Bronchoaspirate	Ciudad de Mexico	369	OCL1	KL9	1	1	0	0	0	0	0	1	0	0	1	1	1	1	1	0	0	0	1	1	0	1	1	1	1	1	1	1	1	1	0	0	0	0	0	0	0	0	0
GCA_016497845	19	4	baumannii	2018-10-05	male	Bronchoaspirate	Ciudad de Mexico	369	OCL1	KL9	1	1	0	0	0	0	0	1	0	0	1	1	1	1	1	0	1	0	1	1	0	1	1	1	1	1	1	1	1	1	0	0	0	0	0	0	0	0	0
GCA_016497865	20	4	baumannii	2018-09-12	female	Total blood	Ciudad de Mexico	369	OCL1	KL9	1	1	0	0	0	0	0	1	0	1	1	1	1	1	1	0	1	0	1	1	0	1	1	1	1	1	1	1	1	1	0	0	0	0	0	0	0	0	0
GCA_016497885	21	4	baumannii	2018-11-11	male	urine	Ciudad de Mexico	369	OCL1	KL9	1	1	0	0	0	0	0	1	0	0	1	1	1	1	1	0	1	0	1	1	0	1	1	1	1	1	1	1	1	1	0	0	0	0	0	0	0	0	0
GCF_030549735	143	4	Aba/78 ISSSTE 2015	2015-06-26	female	cerebrospinal fluid	Ciudad de Mexico	369	OCL1	KL9	1	1	0	0	0	0	0	1	0	1	1	1	1	1	1	0	0	0	1	1	0	1	1	1	1	1	1	1	1	1	0	0	0	0	0	0	0	0	0
GCA_016487785	11	5	Ab AB1332	2014	missing	not collected	not collected	758	OCL10	KL9	0	0	1	1	0	0	0	0	1	0	0	0	1	1	1	1	0	0	0	0	1	0	0	1	1	1	1	1	0	0	0	0	0	0	0	0	0	0	0
GCA_032217425	25	5	Microbial	2018	missing	secretion fluid	Ciudad de Mexico	758	OCL10	KL9	0	0	1	1	0	0	0	0	1	0	0	0	1	1	1	1	0	0	0	0	1	0	0	1	1	1	1	1	0	0	0	0	0	0	0	0	0	0	0
GCF_001922425	30	5	11510	2012	missing	Bronchial	Ciudad de Mexico	758	OCL10	KL9	0	0	1	1	0	0	0	0	1	0	0	0	1	1	1	1	0	0	0	0	1	0	0	1	1	1	1	1	0	0	0	0	0	0	0	0	0	0	0
GCF_001922635	31	5	11502	2012	missing	Bronchial	Ciudad de Mexico	758	OCL10	KL9	0	0	1	1	0	0	0	0	1	0	0	0	1	1	0	1	0	0	0	0	1	0	0	1	1	1	1	1	0	0	0	0	0	0	0	0	0	0	0
GCF_001922695	33	5	11547	2013	missing	Bronchial	Ciudad de Mexico	758	OCL10	KL9	0	0	1	1	0	0	0	0	1	0	0	0	1	1	0	1	0	0	0	0	1	0	0	1	1	1	1	1	0	0	0	0	0	0	0	0	0	0	0
GCF_001922705	34	5	11536	2011	missing	unknown	Ciudad de Mexico	758	OCL10	KL9	0	0	1	1	0	0	0	0	1	0	0	0	1	1	1	1	0	0	0	0	1	0	0	1	1	1	1	1	0	0	0	0	0	0	0	0	0	0	0
GCF_001922745	35	5	11551	2011	missing	unknown	Ciudad de Mexico	758	OCL10	KL9	0	0	1	1	0	0	0	0	1	0	0	0	1	1	1	1	0	0	0	0	1	0	0	1	1	1	1	1	0	0	0	0	0	0	0	0	0	0	0
GCF_001922755	36	5	11606	2011	missing	Bronchial	Ciudad de Mexico	758	OCL10	KL9	0	0	1	1	0	0	0	0	1	0	0	0	1	1	1	1	0	0	0	0	0	0	0	1	1	1	1	1	0	0	0	0	0	0	0	0	0	0	0
GCF_003345235	38	5	810CP	2015-01-11	male	feces	Ciudad de Mexico	758	OCL10	KL9	0	0	1	1	0	0	0	0	1	0	0	0	1	1	1	1	0	0	0	0	1	0	0	1	1	1	1	1	0	0	0	0	0	0	0	0	0	0	0
GCF_003976985	47	5	434H	2015-01-11	male	Bloodstream	Ciudad de Mexico	758	OCL10	KL9	0	0	1	1	0	0	0	0	1	0	0	0	1	1	1	1	0	0	0	0	1	0	0	1	1	1	1	1	0	0	0	0	0	0	0	0	0	0	0
GCF_003977015	48	5	483H	2015-01-11	male	Bloodstream	Ciudad de Mexico	758	OCL10	KL9	0	0	1	1	0	0	0	0	1	0	0	0	1	1	1	1	0	0	0	0	1	0	0	1	1	1	1	1	0	0	0	0	0	0	0	0	0	0	0
GCF_003977045	49	5	433H	2015-01-11	male	Bloodstream	Ciudad de Mexico	758	OCL10	KL9	0	0	1	1	0	0	0	0	1	0	0	0	1	1	1	1	0	0	0	0	1	0	0	1	1	1	1	1	0	0	0	0	0	0	0	0	0	0	0
GCF_004209005	51	5	A278	2013	missing	wound	Ciudad de Mexico	758	OCL10	KL9	0	0	1	1	0	0	0	0	1	0	0	0	1	1	1	1	0	0	0	0	1	0	0	1	1	1	1	1	0	0	0	0	0	0	0	0	0	0	0
GCF_004209035	53	5	A465	2014	missing	Not collected	Ciudad de Mexico	758	OCL10	KL9	0	0	1	1	0	0	0	0	1	0	0	0	1	1	1	1	0	0	0	0	1	0	0	1	1	1	1	1	0	0	0	0	0	0	0	0	0	0	0
GCF_004299615	58	5	Ab5013	2014	missing	Not collected	Ciudad de Mexico	758	OCL10	KL9	0	0	1	1	0	0	0	0	1	0	0	0	1	1	1	1	0	0	0	0	1	0	0	1	1	1	1	1	0	0	0	0	0	0	0	0	0	0	0
GCF_004321575	59	5	Ab4197	2013	missing	Not collected	Ciudad de Mexico	758	OCL10	KL9	0	0	1	1	0	0	0	0	1	0	0	0	1	1	1	1	0	0	0	0	1	0	0	1	1	1	0	0	0	0	0	0	0	0	0	0	0	0	0
GCF_004321595	60	5	Ab2159	2011	missing	Not collected	Ciudad de Mexico	758	OCL10	KL9	0	0	1	1	0	0	0	0	1	0	0	0	1	1	1	1	0	0	0	0	1	0	0	1	1	1	1	1	0	0	0	0	0	0	0	0	0	0	0
GCF_004794205	61	5	Ab5038	NA	not collected	not collected	Ciudad de Mexico	758	OCL10	KL9	0	0	1	1	0	0	0	0	1	0	0	0	1	1	1	1	0	0	0	0	1	0	0	1	1	1	1	1	0	0	0	0	0	0	0	0	0	0	0
GCF_030549715	142	5	Aba/77 ISSSTE 2015	2015-05-22	male	Blood culture	Ciudad de Mexico	758	OCL10	KL9	0	0	1	1	0	0	0	0	1	0	0	0	1	1	1	1	0	0	0	0	1	0	0	1	1	1	0	0	0	0	0	0	0	0	0	0	0	0	0
GCA_016497765	15	6	baumannii	2018-06-11	male	Total blood	Ciudad de Mexico	208	OCL1	KL2	1	0	0	0	0	0	1	0	0	1	1	1	1	1	1	0	1	0	1	1	0	1	1	1	1	1	1	1	1	1	0	0	0	0	0	0	0	0	0
GCF_030549675	140	6	Aba/75 ISSSTE 2015	2015-04-13	male	Blood culture	Ciudad de Mexico	208	OCL1	KL2	1	0	0	0	0	0	1	0	0	0	1	0	1	1	1	0	1	0	0	0	1	0	0	1	1	1	1	0	1	1	0	0	0	0	0	0	0	0	0
GCF_030549685	141	6	Aba/76 ISSSTE 2015	2015-04-03	male	cerebrospinal fluid	Ciudad de Mexico	208	OCL1	KL2	1	0	0	0	0	0	1	0	0	0	1	0	1	1	1	0	1	0	0	0	1	0	0	1	1	1	1	0	1	1	0	0	0	0	0	0	0	0	0
GCF_030756475	145	6	ARC6644	2016	missing	Unknown	Unknown	208	OCL1	KL213	0	0	0	0	0	0	1	0	0	1	1	1	1	1	1	0	1	0	1	1	0	1	1	1	1	1	0	1	1	1	1	0	0	0	0	0	0	0	0
GCA_031140685	24	7	Microbial	2018	missing	sputum	Ciudad de Mexico	1054	OCL10	KL32	0	0	1	1	0	0	0	0	1	0	0	0	1	1	1	1	0	1	0	0	1	0	0	1	1	1	1	1	0	0	0	0	0	0	0	0	0	0	0
GCF_030548745	139	7	Aba/80 HGM 2016	2016-04-30	female	Blood culture	Ciudad de Mexico	1054	OCL10	KL32	0	0	1	1	0	0	0	0	1	0	0	0	1	1	1	1	0	1	0	0	1	0	0	1	1	1	1	1	0	0	0	0	0	0	0	0	0	0	0
GCF_001922685	32	8	4113	2013	missing	blood	Ciudad de Mexico	758	OCL10	KL9	0	0	1	0	0	0	0	0	1	0	0	0	1	1	1	1	0	0	0	0	0	0	0	1	1	1	0	0	0	0	0	0	0	0	0	0	0	0	0
GCF_026929695	136	8	298-03	2009-01-25	missing	wound	Jalisco	758	OCL10	KL9	0	1	1	0	0	0	0	0	1	0	0	0	1	1	1	1	0	0	0	0	1	0	0	1	1	1	0	1	0	0	0	0	0	0	0	0	0	0	0
GCF_026935825	137	8	075-16 HCG	2016-04-19	missing	Upper respiratory tract	Jalisco	758	OCL10	KL9	0	1	1	0	0	0	0	0	1	0	0	0	1	1	1	1	0	0	0	0	1	0	0	1	1	1	1	1	0	0	0	0	0	0	0	0	0	0	0
GCF_026935835	138	8	500-03	2011-10-04	missing	wound	Jalisco	758	OCL10	KL9	0	1	1	0	1	0	0	0	1	0	0	0	1	1	1	1	0	0	0	0	1	0	0	1	1	1	1	1	0	0	0	0	0	0	0	0	0	0	0
GCF_030549745	144	8	Aba/79 HCG 2016	2016-01-06	male	Blood culture	Jalisco	758	OCL10	KL9	0	1	1	0	0	0	0	0	1	0	0	0	1	1	1	1	0	0	0	0	1	0	0	1	1	1	1	1	0	0	0	0	0	0	0	0	0	0	0
GCF_021173285	63	9	Ab-HCG0316-68	2016-03-06	male	urine	Jalisco	136	OCL1	KL77	1	1	0	0	0	0	0	1	0	0	1	1	1	1	1	0	1	1	1	1	1	1	1	1	1	1	1	1	1	1	0	0	0	0	0	0	0	0	0
GCF_021173305	64	9	Ab-HCG1217-85	2017-12-07	male	blood	Jalisco	136	OCL1	KL77	1	1	0	0	0	0	0	1	0	0	1	1	1	1	1	0	1	1	1	1	1	1	1	1	1	1	1	1	1	1	0	0	0	0	0	0	0	0	0
GCF_021173645	66	9	Ab-HCG0216-81	2016-02-24	male	Respiratory tract secretions	Jalisco	136	OCL1	KL77	1	1	0	0	0	0	0	1	0	0	1	1	1	1	1	0	1	1	1	1	1	1	1	1	1	1	1	1	1	1	0	0	0	0	0	0	0	0	0
GCF_021173665	68	9	Ab-HCG1217-84	2017-12-06	male	blood	Jalisco	136	OCL1	KL77	1	1	0	0	0	0	0	1	0	0	1	1	1	1	1	0	1	1	1	1	1	1	1	1	1	1	1	1	1	1	0	0	0	0	0	0	0	0	0
GCF_021173725	69	9	Ab-HCG0216-66	2016-02-17	female	blood	Jalisco	136	OCL1	KL77	1	1	0	0	0	0	0	1	0	0	1	1	1	1	1	0	1	1	1	1	1	1	1	1	1	1	1	1	1	1	0	0	0	0	0	0	0	0	0
GCF_021173805	72	9	Ab-HCG0216-67	2016-02-20	female	Respiratory tract secretions	Jalisco	136	OCL1	KL77	1	1	0	0	0	0	0	1	0	0	1	1	1	1	1	0	1	1	1	1	1	1	1	1	1	1	1	1	1	1	0	0	0	0	0	0	0	0	0
GCF_021173925	74	9	Ab-HCG0216-65	2016-02-12	female	blood	Jalisco	136	OCL1	KL77	1	1	0	0	0	0	0	1	0	0	1	1	1	1	1	0	1	1	1	1	1	1	1	1	1	1	1	1	1	1	0	0	0	0	0	0	0	0	0
GCF_021173985	77	10	Ab-HCG1011-64	2011-10-21	male	urine	Jalisco	369	OCL1	KL9	1	0	0	0	1	0	1	0	0	1	1	1	1	1	1	0	0	0	1	1	1	1	1	1	1	1	1	1	1	1	0	0	0	0	0	0	0	0	0
GCF_021174045	80	10	Ab-HCG0911-58	2011-09-08	male	Wound secretions	Jalisco	208	OCL1	KL9	1	1	0	0	1	0	1	0	0	1	1	1	1	1	1	0	1	0	1	1	1	1	1	1	1	1	1	1	1	1	0	0	0	0	0	0	0	0	0
GCF_021174085	82	11	Ab-HCG0911-56	2011-09-07	female	sputum	Jalisco	208	OCL1	KL2	1	0	0	0	1	0	1	0	0	1	1	1	1	1	1	0	1	0	1	1	1	1	1	1	1	1	1	1	1	1	0	0	0	0	0	0	0	0	0
GCF_021174125	84	11	Ab-HCG0611-54	2011-06-03	female	Secretion	Jalisco	208	OCL1	KL2	1	0	0	0	1	0	1	0	0	1	1	1	1	1	1	0	0	0	1	1	1	1	1	1	1	1	1	1	1	1	0	0	0	0	0	0	0	0	0
GCF_021174795	118	11	Ab-HCG0808-17	2008-08-05	female	Wound secretions	Jalisco	208	OCL1	KL2	1	1	0	0	0	0	1	0	0	1	1	1	1	1	1	0	0	0	1	1	0	1	1	1	1	1	1	1	1	1	0	0	0	0	0	0	0	0	0
GCF_021174895	123	11	Ab-HCG0708-14	2008-07-31	female	Wound secretions	Jalisco	208	OCL1	KL2	1	1	0	0	0	0	1	0	0	1	1	1	1	1	1	0	1	0	1	1	0	1	1	1	1	1	1	1	1	1	0	0	0	0	0	0	0	0	0
GCF_021174965	126	11	Ab-HCG0108-10	2008-01-01	female	Secretion	Jalisco	208	OCL1	KL2	1	1	0	0	0	0	1	0	0	1	1	1	1	1	1	0	0	0	1	1	1	1	1	1	1	1	1	1	1	1	0	0	0	0	0	0	0	0	0
GCF_021175125	134	11	Ab-HCG0807-2	2007-08-27	male	blood	Jalisco	208	OCL1	KL2	1	0	0	0	0	0	1	0	0	1	1	1	1	1	1	0	0	0	1	1	1	1	1	1	1	1	1	1	1	1	0	0	0	0	0	0	0	0	0
GCF_021175145	135	11	Ab-HCG0307-1	2007-05-03	female	blood	Jalisco	208	OCL1	KL2	1	0	0	0	0	0	1	0	0	1	1	1	1	1	1	0	0	0	1	1	1	1	1	1	1	1	1	1	1	1	0	0	0	0	0	0	0	0	0
GCF_021174135	85	12	Ab-HCG0909-51	2009-09-25	female	Other secretions	Jalisco	417	OCL1	KL23	1	1	0	0	0	0	1	0	0	1	1	1	1	0	0	0	0	0	1	1	0	1	1	1	1	1	1	1	0	0	0	0	0	0	0	0	0	0	0
GCF_021174205	88	12	Ab-HCG0709-50	2009-07-28	male	Respiratory tract secretions	Jalisco	417	OCL1	KL23	1	1	0	0	1	0	1	0	0	1	1	1	1	0	0	0	0	0	1	1	0	1	1	1	1	1	1	1	0	0	0	0	0	0	0	0	0	0	0
GCF_021174265	91	12	Ab-HCG0409-48	2009-04-11	male	Central venous access devices	Jalisco	417	OCL1	KL23	1	1	0	0	0	0	1	0	0	1	1	1	1	0	0	0	0	0	1	1	0	1	1	1	1	1	1	1	0	0	0	0	0	0	0	0	0	0	0
GCF_021174245	90	13	Ab-HCG0309-46	2009-03-09	male	blood	Jalisco	417	OCL1	KL23	1	1	0	0	0	0	1	0	0	1	1	1	1	0	0	0	0	0	1	1	0	1	1	1	1	1	1	1	0	0	0	0	0	0	0	0	0	0	0
GCF_021174285	92	13	Ab-HCG0309-47	2009-03-28	male	Wound secretions	Jalisco	417	OCL1	KL23	1	1	0	0	0	0	1	0	0	1	1	1	1	0	0	0	0	0	1	1	0	1	1	1	1	1	1	1	0	0	0	0	0	0	0	0	0	0	0
GCF_021174295	93	13	Ab-HCG0209-45	2009-02-20	female	Respiratory tract secretions	Jalisco	417	OCL1	KL23	1	1	0	0	0	0	1	0	0	1	1	1	1	0	0	0	0	0	1	1	0	1	1	1	1	1	1	1	0	0	0	0	0	0	0	0	0	0	0
GCF_021174325	94	13	Ab-HCG0209-44	2009-02-04	male	Other fluids	Jalisco	417	OCL1	KL23	1	1	0	0	0	0	1	0	0	1	1	1	1	0	0	0	0	0	1	1	0	1	1	1	1	1	1	1	0	0	0	0	0	0	0	0	0	0	0
GCF_021174345	95	13	Ab-HCG0109-42	2009-01-19	male	blood	Jalisco	417	OCL1	KL23	1	1	0	0	0	0	1	0	0	1	1	1	1	0	0	0	0	0	1	1	0	1	1	1	1	1	1	1	0	0	0	0	0	0	0	0	0	0	0
GCF_021174365	96	13	Ab-HCG0109-41	2009-01-15	male	Other secretions	Jalisco	417	OCL1	KL23	1	1	0	0	0	0	1	0	0	1	1	1	1	0	0	0	0	0	1	1	0	1	1	1	1	1	1	1	0	0	0	0	0	0	0	0	0	0	0
GCF_021174385	97	13	Ab-HCG0109-40	2009-01-15	male	Intra-abdominal secretions	Jalisco	417	OCL1	KL23	1	1	0	0	0	0	1	0	0	1	1	1	1	0	0	0	0	0	1	1	0	1	1	1	1	1	1	1	0	0	0	0	0	0	0	0	0	0	0
GCF_021174395	98	13	Ab-HCG0109-38	2009-01-10	male	blood	Jalisco	417	OCL1	KL23	1	1	0	0	0	0	1	0	0	1	1	1	1	0	0	0	0	0	1	1	0	1	1	1	1	1	1	1	0	0	0	0	0	0	0	0	0	0	0
GCF_021174425	99	13	Ab-HCG0109-37	2009-01-03	male	Central venous access devices	Jalisco	417	OCL1	KL23	1	1	0	0	0	0	1	0	0	1	1	1	1	0	0	0	1	0	1	1	0	1	1	1	1	1	1	1	0	0	0	0	0	0	0	0	0	0	0
GCF_021174435	100	13	Ab-HCG0109-39	2009-01-12	male	Central venous access devices	Jalisco	417	OCL1	KL23	1	1	0	0	0	0	1	0	0	1	1	1	1	0	0	0	0	0	1	1	0	1	1	1	1	1	1	1	0	0	0	0	0	0	0	0	0	0	0
GCF_021174465	101	13	Ab-HCG0109-36	2009-01-01	male	Intra-abdominal secretions	Jalisco	417	OCL1	KL23	1	1	0	0	0	0	1	0	0	1	1	1	1	0	0	0	0	0	1	1	0	1	1	1	1	1	1	1	0	0	0	0	0	0	0	0	0	0	0
GCF_021174485	102	13	Ab-HCG1208-35	2008-12-30	male	Other secretions	Jalisco	417	OCL1	KL23	1	1	0	0	0	0	1	0	0	1	1	1	1	0	0	0	0	0	1	1	0	1	1	1	1	1	1	1	0	0	0	0	0	0	0	0	0	0	0
GCF_021174505	103	13	Ab-HCG1108-33	2008-11-24	male	Respiratory tract secretions	Jalisco	417	OCL1	KL23	1	1	0	0	0	0	1	0	0	1	1	1	1	0	0	0	1	0	1	1	0	1	1	1	1	1	1	1	0	0	0	0	0	0	0	0	0	0	0
GCF_021174515	104	13	Ab-HCG1108-32	2008-11-19	male	Respiratory tract secretions	Jalisco	417	OCL1	KL23	1	1	0	0	0	0	1	0	0	1	1	1	1	0	0	0	0	0	1	1	0	1	1	1	1	1	1	1	0	0	0	0	0	0	0	0	0	0	0
GCF_021174525	105	13	Ab-HCG1208-34	2008-12-06	female	cerebrospinal fluid	Jalisco	417	OCL1	KL23	1	1	0	0	0	0	1	0	0	1	1	1	1	0	0	0	0	0	1	1	0	1	1	1	1	1	1	1	0	0	0	0	0	0	0	0	0	0	0
GCF_021174565	106	13	Ab-HCG1108-31	2008-11-16	male	Central venous access devices	Jalisco	417	OCL1	KL23	1	1	0	0	0	0	1	0	0	1	1	1	1	0	0	0	1	0	1	1	0	1	1	1	1	1	1	1	0	0	0	0	0	0	0	0	0	0	0
GCF_021174585	107	13	Ab-HCG0908-27	2008-09-30	male	Central venous access devices	Jalisco	417	OCL1	KL23	1	1	0	0	0	0	1	0	0	1	1	1	1	0	0	0	0	0	1	1	0	1	1	1	1	1	1	1	0	0	0	0	0	0	0	0	0	0	0
GCF_021174595	108	13	Ab-HCG1108-30	2008-11-08	male	Respiratory tract secretions	Jalisco	417	OCL1	KL23	1	1	0	0	0	0	1	0	0	1	1	1	1	0	0	0	0	0	1	1	0	1	1	1	1	1	1	1	0	0	0	0	0	0	0	0	0	0	0
GCF_021174605	109	13	Ab-HCG1008-28	2008-10-27	male	Wound secretions	Jalisco	417	OCL1	KL23	1	1	0	0	0	0	1	0	0	1	1	1	1	0	0	0	0	0	1	1	0	1	1	1	1	1	1	1	0	0	0	0	0	0	0	0	0	0	0
GCF_021174645	110	13	Ab-HCG1108-29	2008-11-08	male	Central venous access devices	Jalisco	417	OCL1	KL23	1	1	0	0	0	0	1	0	0	1	1	1	1	0	0	0	0	0	1	1	0	1	1	1	1	1	1	1	0	0	0	0	0	0	0	0	0	0	0
GCF_021174665	111	13	Ab-HCG0908-23	2008-09-18	male	Other fluids	Jalisco	417	OCL1	KL23	1	1	0	0	0	0	1	0	0	1	1	1	1	0	0	0	1	0	1	1	0	1	1	1	1	1	1	1	0	0	0	0	0	0	0	0	0	0	0
GCF_021174685	112	13	Ab-HCG0908-25	2008-09-26	male	blood	Jalisco	417	OCL1	KL23	1	1	0	0	0	0	1	0	0	1	1	1	1	0	0	0	0	0	1	1	0	1	1	1	1	1	1	1	0	0	0	0	0	0	0	0	0	0	0
GCF_021174695	113	13	Ab-HCG0908-24	2008-09-19	male	Wound secretions	Jalisco	417	OCL1	KL23	1	1	0	0	0	0	1	0	0	1	1	1	1	0	0	0	1	0	1	1	0	1	1	1	1	1	1	1	0	0	0	0	0	0	0	0	0	0	0
GCF_021174725	114	13	Ab-HCG0908-26	2008-09-28	female	Central venous access devices	Jalisco	417	OCL1	KL23	1	1	0	0	0	0	1	0	0	1	1	1	1	0	0	0	0	0	1	1	0	1	1	1	1	1	1	1	0	0	0	0	0	0	0	0	0	0	0
GCF_021174745	115	13	Ab-HCG0808-22	2008-08-27	male	Wound secretions	Jalisco	417	OCL1	KL23	1	1	0	0	0	0	1	0	0	1	1	1	1	0	0	0	0	0	1	1	0	1	1	1	1	1	1	1	0	0	0	0	0	0	0	0	0	0	0
GCF_021174765	116	13	Ab-HCG0808-18	2008-08-05	male	Respiratory tract secretions	Jalisco	417	OCL1	KL23	1	1	0	0	0	0	1	0	0	1	1	1	1	0	0	0	0	0	1	1	0	1	1	1	1	1	1	1	0	0	0	0	0	0	0	0	0	0	0
GCF_021174775	117	13	Ab-HCG0808-20	2008-08-13	male	Wound secretions	Jalisco	417	OCL1	KL23	1	1	0	0	0	0	1	0	0	1	1	1	1	0	0	0	0	0	1	1	0	1	1	1	1	1	1	1	0	0	0	0	0	0	0	0	0	0	0
GCF_021174815	119	13	Ab-HCG0808-21	2008-08-25	male	Central venous access devices	Jalisco	417	OCL1	KL23	1	1	0	0	0	0	1	0	0	1	1	1	1	0	0	0	0	0	1	1	0	1	1	1	1	1	1	1	0	0	0	0	0	0	0	0	0	0	0
GCF_021174825	120	13	Ab-HCG0808-19	2008-08-11	male	Wound secretions	Jalisco	417	OCL1	KL23	1	1	0	0	0	0	1	0	0	1	1	0	1	0	0	0	0	0	1	1	0	1	1	1	1	1	1	1	0	0	0	0	0	0	0	0	0	0	0
GCF_021174865	121	13	Ab-HCG0808-16	2008-08-10	male	Wound secretions	Jalisco	417	OCL1	KL23	1	1	0	0	0	0	1	0	0	1	1	1	1	0	0	0	0	0	1	1	0	1	1	1	1	1	1	1	0	0	0	0	0	0	0	0	0	0	0
GCF_021174875	122	13	Ab-HCG0808-15	2008-08-02	male	Intra-abdominal secretions	Jalisco	417	OCL1	KL23	1	1	0	0	0	0	1	0	0	1	1	1	1	0	0	0	0	0	1	1	0	1	1	1	1	1	1	1	0	0	0	0	0	0	0	0	0	0	0
GCF_021174925	124	13	Ab-HCG0908-12	2008-09-18	male	Other fluids	Jalisco	417	OCL1	KL23	1	1	0	0	0	0	1	0	0	1	1	1	1	0	0	0	1	0	1	1	0	1	1	1	1	1	1	1	0	0	0	0	0	0	0	0	0	0	0
GCF_021174945	125	13	Ab-HCG0708-13	2008-07-26	male	Wound secretions	Jalisco	417	OCL1	KL23	1	1	0	0	0	0	1	0	0	1	1	0	1	0	0	0	0	0	1	1	0	1	1	1	1	1	1	1	0	0	0	0	0	0	0	0	0	0	0
GCF_021174985	127	14	Ab-HCG1207-7	2007-12-24	male	Wound secretions	Jalisco	208	OCL1	KL2	1	1	0	0	0	0	1	0	0	1	1	1	1	1	1	0	0	0	1	1	0	1	1	1	1	1	1	1	1	1	0	0	0	0	0	0	0	0	0
GCF_021175005	128	14	Ab-HCG1207-9	2007-12-26	female	Respiratory tract secretions	Jalisco	208	OCL1	KL2	1	1	0	0	0	0	1	0	0	1	1	1	1	1	1	0	0	0	1	1	0	1	1	1	1	1	1	1	1	1	0	0	0	0	0	0	0	0	0
GCF_021175015	129	14	Ab-HCG1207-8	2007-12-25	male	Central venous access devices	Jalisco	208	OCL1	KL2	1	1	0	0	0	0	1	0	0	1	1	1	1	1	1	0	0	0	1	1	0	1	1	1	1	1	1	1	1	1	0	0	0	0	0	0	0	0	0
GCF_021175045	130	14	Ab-HCG1207-6	2007-12-19	female	Respiratory tract secretions	Jalisco	208	OCL1	KL2	1	1	0	0	0	0	1	0	0	1	1	1	1	1	1	0	0	0	1	1	0	1	1	1	1	1	1	1	1	1	0	0	0	0	0	0	0	0	0
GCF_021175065	131	14	Ab-HCG1207-5	2007-12-10	male	Respiratory tract secretions	Jalisco	208	OCL1	KL2	1	1	0	0	0	0	1	0	0	1	1	1	1	1	1	0	0	0	1	1	0	1	1	1	1	1	1	1	1	1	0	0	0	0	0	0	0	0	0
GCF_021175095	133	14	Ab-HCG1107-4	2007-11-27	female	Secretion	Jalisco	208	OCL1	KL2	1	1	0	0	0	0	1	0	0	1	1	1	1	1	1	0	0	0	1	1	0	1	1	1	1	1	1	1	1	1	0	0	0	0	0	0	0	0	0
GCA_016485485	3	Single	Ab AB1333	2014	missing	not collected	not collected	758	OCL10	KL9	0	0	1	1	0	0	0	0	1	0	0	0	1	1	1	1	0	0	0	0	1	0	0	1	1	1	1	1	0	0	0	0	0	0	0	0	0	0	0
GCA_016486105	5	Single	Acinetobacter AB1357	2014	missing	not collected	not collected	225	OCL3	KL22	0	0	0	0	0	1	0	0	0	1	0	0	1	0	0	0	0	1	0	0	1	0	0	1	1	0	1	1	0	0	0	0	0	0	0	0	0	0	0
GCA_016609765	22	Single	Ab AB1261	2013	missing	not collected	not collected	473	OCL1	KL22	1	0	0	0	1	0	1	0	0	1	1	1	1	1	1	0	1	0	1	1	0	1	1	1	1	1	1	1	1	1	0	0	0	0	0	0	0	0	0
GCA_031140665	23	Single	Microbial	2018	missing	secretion fluid	Ciudad de Mexico	758	OCL10	KL9	0	1	1	0	0	0	0	0	1	0	0	0	1	1	1	1	0	0	0	0	1	0	0	1	1	1	1	1	0	0	0	0	0	0	0	0	0	0	0
GCA_032217445	26	Single	Microbial	2018	missing	blood	Ciudad de Mexico	758	OCL10	KL9	0	1	1	0	0	0	0	0	1	0	0	0	1	1	1	1	0	0	0	0	1	0	0	1	1	1	1	1	0	0	0	0	0	0	0	0	0	0	0
GCF_001549575	27	Single	MEX11594	2011-06-17	missing	Pleural fluid	Ciudad de Mexico	758	OCL1	KL1	0	0	0	0	0	0	0	0	0	0	0	0	1	0	0	0	0	0	0	0	0	0	0	1	0	1	1	1	0	0	0	0	1	0	0	0	1	1	0
GCF_001636235	28	Single	3207	2008-08-05	female	Bronchial fluid	Nuevo Leon	1321	OCL10	KL195	0	0	1	0	0	1	0	0	0	0	0	0	1	0	0	0	0	1	0	0	1	0	0	1	1	1	0	0	0	0	0	0	0	0	0	1	0	0	0
GCF_001896005	29	Single	AF-401	2009-07-01	missing	Small Colon	Ciudad de Mexico	1942	OCL10	KL23	0	0	1	0	0	0	0	0	0	1	0	0	1	1	1	1	0	0	0	0	1	0	0	1	1	1	1	1	0	0	0	0	0	1	1	0	0	0	0
GCF_001923005	37	Single	11598	2011	missing	unknown	Ciudad de Mexico	758	OCL10	KL9	0	0	1	1	0	0	0	0	1	0	0	0	1	1	0	1	0	0	0	0	0	0	0	1	1	1	1	1	0	0	0	0	0	0	0	0	1	0	0
GCF_003431385	39	Single	7804	2006-07-05	male	bronchoalveolar lavage fluid	Nuevo Leon	490	OCL7	KL7	0	0	0	0	0	0	0	0	0	0	0	0	1	1	1	0	0	1	0	0	0	0	0	1	1	1	1	1	0	0	0	1	0	0	0	0	0	0	0
GCF_003516005	40	Single	7847	2008-04-28	female	blood	Nuevo Leon	208	OCL1	KL2	1	0	0	0	0	1	1	0	0	1	1	1	1	1	1	0	1	1	1	1	0	1	1	1	1	1	1	1	1	1	0	0	0	0	0	0	0	0	0
GCF_003522665	41	Single	9201	2013-08-01	male	blood	Jalisco	934	OCL10	KL9	0	1	1	0	0	0	0	0	0	1	0	0	1	0	0	0	0	1	1	1	1	0	0	1	1	1	0	0	0	0	0	0	0	1	0	1	0	0	0
GCF_003522705	42	Single	10324	2012-08-01	male	Bronchial fluid	Gerrero	771	OCL2	KL77	0	0	0	0	0	0	0	0	0	0	0	0	1	0	0	0	0	0	0	0	1	0	0	1	1	1	0	0	1	1	0	0	0	0	0	0	0	0	0
GCF_003522785	43	Single	10042	2011-04-10	female	Secretion	Cuahuila	473	OCL1	KL22	1	1	0	0	0	0	0	1	0	1	1	1	1	1	1	0	1	1	1	1	0	1	1	1	1	1	1	1	1	1	0	0	0	0	0	0	0	0	0
GCF_003522845	44	Single	9102	2010-06-04	female	Bronchial fluid	Baja California	231	OCL7	KL1	0	0	0	0	0	0	0	0	0	0	0	0	1	1	1	0	0	1	0	0	1	0	0	1	1	1	0	0	0	0	0	0	1	1	1	0	0	0	0
GCF_003522885	45	Single	5845	2009-12-31	male	wound	San Luis Potosi	417	OCL1	KL23	1	1	0	0	0	0	1	0	0	1	1	1	1	1	1	0	1	0	1	1	0	1	1	1	1	1	1	1	1	1	0	0	0	0	0	0	0	0	0
GCF_003976955	46	Single	A2	2015-01-12	male	cerebrospinal fluid	Ciudad de Mexico	758	OCL10	KL9	0	0	1	1	0	0	0	0	1	0	0	0	1	1	1	1	0	0	0	0	1	0	0	1	1	1	1	1	0	0	0	0	0	0	0	0	0	0	0
GCF_004208995	50	Single	A229	2013	missing	Not collected	Ciudad de Mexico	1091	OCL11	KL213	0	0	1	1	0	0	0	0	1	0	0	0	1	1	1	1	0	0	0	0	1	0	0	1	1	1	1	1	0	0	0	0	0	0	0	0	0	0	0
GCF_004209025	52	Single	H170	2013	missing	Blood culture	Ciudad de Mexico	1091	OCL10	KL213	0	0	1	1	0	0	0	0	1	0	0	0	1	1	1	1	0	0	0	0	1	0	0	1	1	1	1	1	0	0	0	0	0	0	0	0	0	0	0
GCF_004209075	54	Single	A023	2011	missing	Necrotic Tissue	Ciudad de Mexico	1091	OCL10	KL213	0	0	1	1	0	0	0	0	1	0	0	0	1	1	1	1	0	0	0	0	1	0	0	1	1	1	1	1	0	0	0	0	0	0	0	0	0	0	0
GCF_004209195	55	Single	H008	2011	missing	Not collected	Ciudad de Mexico	690	OCL6	KL22	0	0	0	1	0	0	0	0	1	0	0	0	1	1	1	1	0	0	0	0	1	0	0	1	1	1	1	1	1	1	0	1	0	0	0	0	0	0	0
GCF_004209205	2	Single	H251	2014	missing	Blood culture	Ciudad de Mexico	758	OCL1	KL9	0	0	1	0	0	0	0	0	0	0	0	0	1	1	1	1	0	0	0	0	1	0	0	1	1	1	1	1	0	0	0	0	0	0	0	0	0	0	0
GCF_004209225	56	Single	A580	2015	missing	Uroculture	Ciudad de Mexico	758	OCL10	KL9	0	0	1	1	0	0	0	0	1	0	0	0	1	1	1	1	0	0	0	0	1	0	0	1	1	1	1	1	0	0	0	0	0	0	0	0	0	0	0
GCF_004296275	57	Single	H350	2015	missing	Blood culture	Ciudad de Mexico	208	OCL1	KL213	1	0	0	1	0	0	1	0	0	0	1	1	1	1	1	0	0	0	1	1	1	1	1	0	1	1	1	1	1	1	0	0	0	0	0	0	0	0	0
GCF_009497995	62	Single	7835	2007-07-16	male	Tissue	Nuevo Leon	227	OCL10	KL22	0	0	1	0	0	0	0	0	0	0	0	0	1	0	0	0	0	1	0	0	1	0	0	1	1	1	0	0	0	0	0	0	0	0	0	1	0	0	0
GCF_021173765	70	Single	Ab-HCG0516-70	2016-05-16	female	Respiratory tract secretions	Jalisco	369	OCL1	KL9	1	1	0	0	0	0	0	1	0	0	1	1	1	1	1	0	1	1	1	1	1	1	1	1	1	1	1	1	1	1	0	0	0	0	0	0	0	0	0
GCF_021173815	73	Single	Ab-HCG0716-73	2016-07-14	female	cerebrospinal fluid	Jalisco	369	OCL1	KL9	1	1	0	0	0	0	0	1	0	0	1	1	1	1	1	0	1	1	1	1	1	1	1	1	1	1	1	1	1	1	0	0	0	0	0	0	0	0	0
GCF_021174185	87	Single	Ab-HCG1110-52	2010-11-11	female	blood	Jalisco	417	OCL1	KL23	1	1	0	0	0	0	1	0	0	1	1	1	1	1	1	0	0	0	1	1	0	1	1	1	1	1	1	1	1	1	0	0	0	0	0	0	0	0	0
GCF_021174225	89	Single	Ab-HCG0509-49	2009-05-08	male	Wound secretions	Jalisco	417	OCL1	KL23	1	1	0	0	0	0	1	0	0	1	1	1	1	0	0	0	0	0	1	1	0	1	1	1	1	1	1	1	0	0	0	0	0	0	0	0	0	0	0
GCF_021175075	132	Single	Ab-HCG1107-3	2007-11-09	male	Respiratory tract secretions	Jalisco	208	OCL1	KL2	0	0	0	0	0	0	1	0	0	0	0	1	1	1	1	0	0	0	1	1	1	0	0	1	1	1	1	1	1	1	1	0	0	0	0	0	0	0	0
GCF_036879865	146	Single	GN-114	2021-12-28	male	BAL	Nuevo Leon	401	OCL6	KL48	0	0	0	0	0	0	0	0	0	0	0	0	1	0	0	0	0	0	0	0	0	0	0	1	0	1	0	0	0	0	0	0	0	0	0	0	0	0	1
GCF_036879965	1	Single	GN-102	2021-12-13	male	BAL	Nuevo Leon	0	OCL5	KL169	0	0	0	0	0	0	0	0	0	0	0	0	1	0	0	0	0	0	0	0	0	0	0	1	0	1	0	0	0	0	0	0	0	0	0	0	0	0	0
											94	87	42	32	10	3	74	21	38	82	95	92	146	101	98	40	38	19	95	95	73	93	93	145	143	145	134	134	61	61	2	2	2	3	2	3	3	1	1
[truncated: 39 more columns]
